# Supplementary material for: Synergistic catalysis of carbon-partitioned LaF3–BaF2 composites for the coupling of CH4 with CHF3 to VDF
Source: Royal Society of Chemistry journal article supplement (doi:10.1039/c8cy02376j), 2019-01-01
Supplement: c8cy02376j1.pdf [file c8cy02376j1.pdf]

## Supporting information

### Synergistic catalysis of carbon partitioned $\text{LaF}_3\text{-BaF}_2$ composite for the coupling of $\text{CH}_4$ with $\text{CHF}_3$ to VDF

Jinchao Wang,<sup>a</sup> Wenfeng Han,<sup>\*a,b,c</sup> Shucheng Wang,<sup>b,c</sup> Haodong Tang,<sup>a</sup> Wucan Liu,<sup>b,c</sup>  
Ying Li,<sup>a</sup> Chunshan Lu,<sup>\*a</sup> Jianjun Zhang,<sup>b,c</sup> Eric M. Kennedy,<sup>d</sup> Xiaonian Li<sup>\*a</sup>

<sup>a</sup> Institute of Industrial Catalysis, Zhejiang University of Technology, Chaowang Road 18, Hangzhou 310014, Zhejiang, P. R. China.

<sup>b</sup> State Key Laboratory of Fluorinated Greenhouse Gases Replacement and Control Treatment, Tianmushan Road 387, Hangzhou 310032, Zhejiang, P. R. China.

<sup>c</sup> Zhejiang Research Institute of Chemical Industry, Tianmushan Road 387, Hangzhou 310032, Zhejiang, P. R. China.

<sup>d</sup> Process Safety and Environment Protection Research Group, School of Engineering, The University of Newcastle, Australia

Email: [hanwf@zjut.edu.cn](mailto:hanwf@zjut.edu.cn) (W.F. Han); [lcszjcn@zjut.edu.cn](mailto:lcszjcn@zjut.edu.cn) (C.S. Lu)

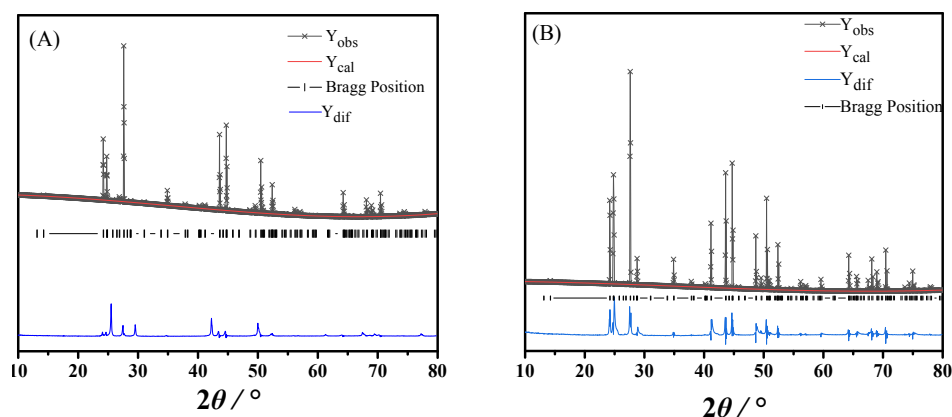

Fig. S1 Rietveld refinement analysis for the XRD patterns of (A)  $\text{LaF}_3\text{-BaF}_2$  composites prepared by HF precipitation method ( $x=0.4$ ) and (B)  $\text{LaF}_3\text{-BaF}_2$  composites prepared by PVDF mediated calcination ( $x=0.6$ ).

Table S1. The phase composition derived from the Rietveld refinement analysis in Fig. S1.

| Catalyst                  | Elemental concentration, mass fraction% |                  |       |                                                    |
|---------------------------|-----------------------------------------|------------------|-------|----------------------------------------------------|
|                           | LaF <sub>3</sub>                        | BaF <sub>2</sub> | LaOF  | Ba <sub>1-x</sub> La <sub>x</sub> F <sub>2+x</sub> |
| HF precipitation          | 34.11                                   | 7.66             | 11.65 | 46.58                                              |
| PVDF mediated calcination | 29.03                                   | 28.89            | 32.20 | 9.88                                               |

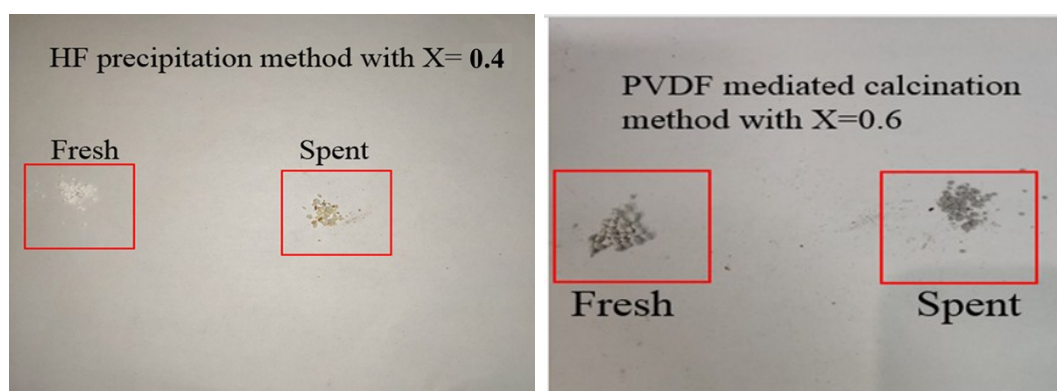

Fig. S2 photo images of fresh and spent catalysts prepared by HF precipitation and PVDF mediated calcination.

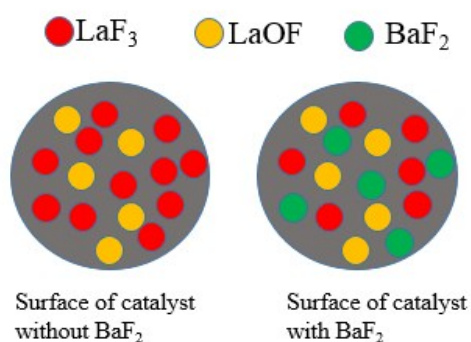

Fig. S3 Schematic illustration for the promotion effect of BaF<sub>2</sub> on LaF<sub>3</sub>-BaF<sub>2</sub> composite catalyst.

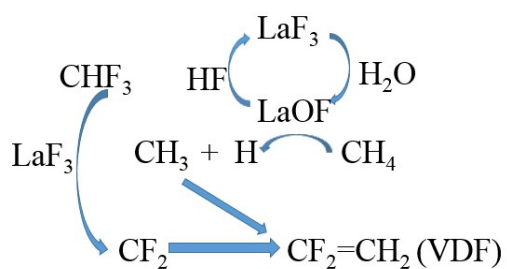

Fig. S4 Proposed reaction mechanism over LaF<sub>3</sub>-BaF<sub>2</sub> composite catalyst.

Table S2. The phase composition derived from the Rietveld refinement analysis in Fig. S5 and S6.

| Catalyst                  | Elemental concentration, mass fraction% |                  |       |                                                    |
|---------------------------|-----------------------------------------|------------------|-------|----------------------------------------------------|
|                           | LaF <sub>3</sub>                        | BaF <sub>2</sub> | LaOF  | Ba <sub>1-x</sub> La <sub>x</sub> F <sub>2+x</sub> |
| HF precipitation          | 36.03                                   | 3.23             | 2.21  | 58.53                                              |
| PVDF mediated calcination | 38.58                                   | 21.05            | 27.61 | 12.76                                              |

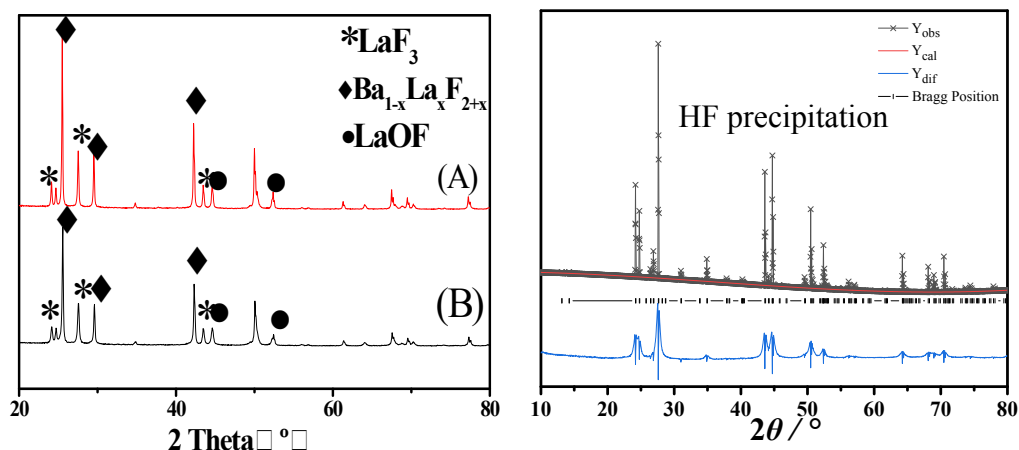

Fig. S5 XRD patterns and Rietveld refinement analysis of catalyst prepared by HF precipitation ( $x=0.4$ ). (A) fresh catalyst and (B) spent catalyst. Reaction conditions: 15 h,  $T$  of 700°C, GHSV of 900h<sup>-1</sup> and feeding CHF<sub>3</sub>/CH<sub>4</sub>/O<sub>2</sub>/N<sub>2</sub>=1:1:0.06:9.

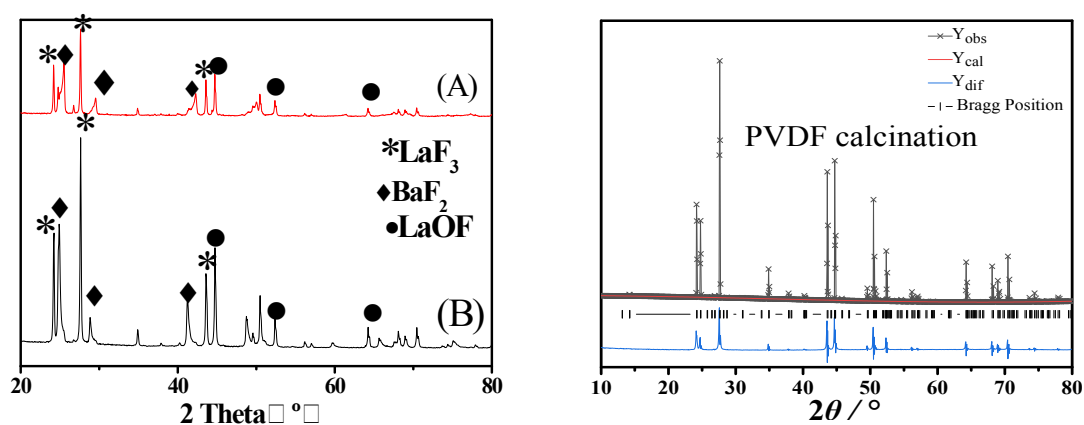

Fig. S6 XRD patterns and Rietveld refinement analysis of catalyst prepared by PVDF mediated calcination ( $x=0.6$ ). (A) fresh catalyst and (B) spent catalyst. Reaction conditions: 15 h,  $T$  of 700°C, GHSV of 900h<sup>-1</sup> and feeding CHF<sub>3</sub>/CH<sub>4</sub>/O<sub>2</sub>/N<sub>2</sub>=1:1:0.06:9.

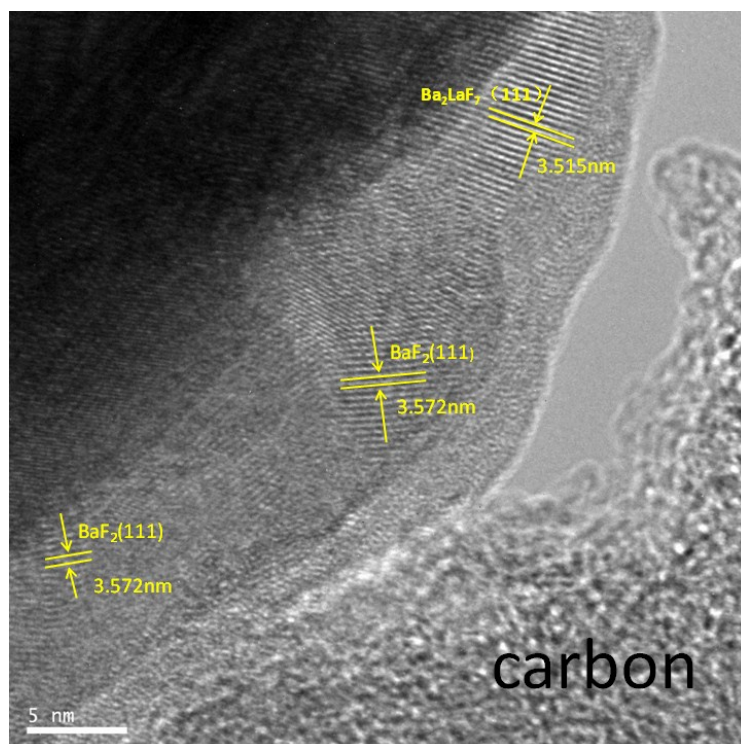

Fig. S7 TEM image of spent catalyst (x of 0.6, prepared by mediated calcination, TOS of 15 h). Reaction conditions: 15 h,  $T$  of  $700^{\circ}\text{C}$ , GHSV of  $900\text{h}^{-1}$  and feeding  $\text{CHF}_3/\text{CH}_4/\text{O}_2/\text{N}_2=1:1:0.06:9$ .

Table S3 Surface elemental composition of fresh and spent catalysts prepared by HF precipitation method with x of 0.4(determined by XPS analysis).

| Catalyst | Elemental concentration, % |       |       |       |      | F/ (3*La+2*B<br>a) |
|----------|----------------------------|-------|-------|-------|------|--------------------|
|          | C                          | O     | F     | La    | Ba   |                    |
| Fresh    | 19.58                      | 18.33 | 49.33 | 13.35 | 6.55 | 0.93               |
| Spent    | 27.73                      | 11.24 | 46.65 | 12.08 | 6.33 | 0.95               |

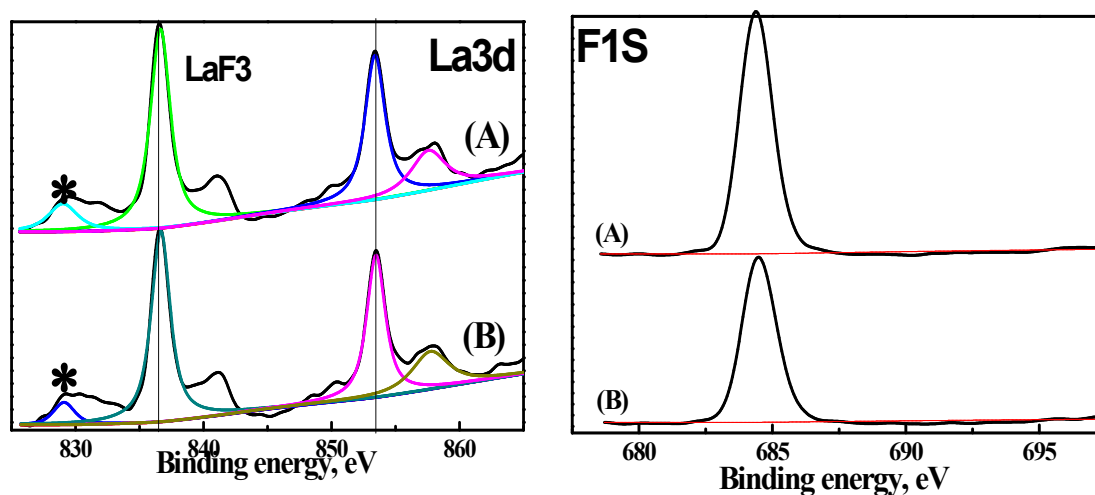

Fig. S8 XPS characterization of catalyst prepared by HF precipitation method with  $X=0.4$ . (A): before reaction; (B) after reaction. The highlight is the F(KLL) Auger transition.

**Table S4** Surface elemental composition of  $\text{LaF}_3$  catalyst prepared by HF precipitation method and PVDF mediated calcination (determined by XPS analysis)

| Catalyst                  | Elemental concentration, % |       |       |       | F/La | O/La |
|---------------------------|----------------------------|-------|-------|-------|------|------|
|                           | C                          | O     | F     | La    |      |      |
| HF Precipitation          | 17.16                      | 9.16  | 52.16 | 21.16 | 2.47 | 0.43 |
| PVDF mediated calcination | 18.67                      | 15.47 | 46.02 | 19.3  | 2.38 | 0.80 |
